# Supplementary material for: Efficacy and safety of vamorolone in Duchenne muscular dystrophy: An 18-month interim analysis of a non-randomized open-label extension study
Source: PLoS Med. 2020 Sep 21;17(9):e1003222. doi: 10.1371/journal.pmed.1003222 (PMC7505441; doi:10.1371/journal.pmed.1003222)
Supplement: S1 Raw Data — (CSV) [file pmed.1003222.s005.csv]

	Subject ID	AGE	Treatment Group (1=0.25, 2=0.75, 3=2.0, 4=6.0)	TTRW.velocity.Baseline	TTRW.velocity.Month.18	GROUP	TTCLIMB.velocity.Baseline	TTCLIMB.velocity.Month.18	TTSTAND.velocity.Baseline	TTSTAND.velocity.Month.18	SMWT.Baseline	SMWT.Month.18	NSAA1.Baseline	NSAA1.18	HEIGHTP.Baseline	HEIGHTP.18	BMIZ.Baseline	BMIZ.Month.18	TTRW.seconds.Baseline	TTRW.seconds.Month.18	TTCLIMB.seconds.Baseline	TTCLIMB.seconds.18	TTSTAND.seconds.Baseline	TTSTAND.seconds.Month.18
1	230801	6	2	1.285347	0.609756	vam	0.103093	0	0.11534	0	223	NA	14	7	5.380162014	1.077951321	-1.210537248	-0.228866198	7.78	16.4	9.7	NA	8.67	NA
2	230803	5.89	4	1.587302	1.666667	vam	0.169492	0.277778	0.153846	0.204082	421	414	17	23	68.2323184	77.93507122	1.238996864	2.443723374	6.3	6	5.9	3.6	6.5	4.9
3	231501	4.15	3	1.315789	1.785714	vam	0.16129	0.263158	0.175439	0.222222	262	368	16	24	2.119788558	2.956462869	1.632509111	1.252727148	7.6	5.6	6.2	3.8	5.7	4.5
4	231502	4.08	2	1.618123	2.717391	vam	0.223214	0.5	0.248756	0.414938	384	NA	18	29	37.84530503	34.93169676	2.092113725	1.594865131	6.18	3.68	4.48	2	4.02	2.41
5	231503	4.73	3	1.923077	2.631579	vam	0.232558	0.333333	0.175439	0.322581	398	509	21	28	89.44941563	88.07120312	1.812586396	1.491709561	5.2	3.8	4.3	3	5.7	3.1
6	231901	4.42	2	1.298701	1.492537	vam	0.147059	0.147059	0.119048	0.135135	261	368	16	18	55.18032479	48.72968682	1.63018983	0.86908905	7.7	6.7	6.8	6.8	8.4	7.4
7	231902	5.08	2	1.785714	1.785714	vam	0.25	0.25	0.128205	0.153846	334	302	17	17	49.35541372	52.8036655	1.187405499	2.517695434	5.6	5.6	4	4	7.8	6.5
8	231903	5.74	4	1.333333	2.173913	vam	0.322581	0.416667	0.15625	0.285714	338	423	23	29	64.2283815	67.97783285	1.009893737	1.931791919	7.5	4.6	3.1	2.4	6.4	3.5
9	232001	5.84	2	1.3947	1.315789	vam	0.104932	0.142857	0.125471	0.135135	300	347	12	14	49.31090463	31.87401753	-0.316388639	0.044585234	7.17	7.6	9.53	7	7.97	7.4
10	232002	4.52	2	1.808318	5.91716	vam	0.333333	0.283286	0.326797	0.387597	353	488	23	32	1.01397401	1.423378902	2.049937775	1.343964414	5.53	1.69	3	3.53	3.06	2.58
11	232003	4.68	2	1.712329	2.03666	vam	0.288184	0.37037	0.333333	0.269542	339	409	19	26	3.102704136	4.452100973	0.111660006	-0.157836393	5.84	4.91	3.47	2.7	3	3.71
12	232004	4.01	2	1.628664	2.475248	vam	0.176056	0.406504	0.232019	0.328947	318	379	20	25	14.26825602	20.93743636	0.872171811	-0.234333065	6.14	4.04	5.68	2.46	4.31	3.04
13	232101	6.34	2	2.083333	1.818182	vam	0.416667	0.3125	0.27027	0.208333	390	417	25	26	60.64646015	53.23977183	-0.883624951	-0.851486568	4.8	5.5	2.4	3.2	3.7	4.8
14	232102	5.87	4	1.923077	2.040816	vam	0.357143	0.30303	0.25	0.188679	337	NA	26	23	49.31090463	75.03532235	0.388194392	1.53324232	5.2	4.9	2.8	3.3	4	5.3
15	232103	6.35	4	2	2.173913	vam	0.357143	0.37037	0.243902	0.227273	452	440	29	27	20.85866829	36.69278191	1.025993594	1.928881499	5	4.6	2.8	2.7	4.1	4.4
16	232301	6.52	1	1.199041	0.846024	vam	0.147493	0.045935	0.127389	0	200	119	14	7	36.07327716	45.11905799	0.899353971	1.800433109	8.34	11.82	6.78	21.77	7.85	NA
17	232302	4.36	4	1.28041	1.234568	vam	0.086806	0.032258	0.071124	0.038911	279	269	13	10	31.28104754	54.5500883	1.244606995	1.670007194	7.81	8.1	11.52	31	14.06	25.7
18	232303	4.52	1	1.644737	2.777778	vam	0.208333	0.434783	0.180832	0.4	341	371	23	32	6.151624283	27.92320417	1.266695529	-0.147342154	6.08	3.6	4.8	2.3	5.53	2.5
19	232304	4.38	1	1.362398	1.960784	vam	0.142248	0.30303	0.25641	0.27027	300	370	17	22	13.30997982	8.804852547	0.848737401	1.142470229	7.34	5.1	7.03	3.3	3.9	3.7
20	232305	4.01	3	1.355014	1.851852	vam	0.144718	0.30303	0.165837	0.27027	NA	368	14	22	29.24572549	30.88674511	0.872171811	0.673755417	7.38	5.4	6.91	3.3	6.03	3.7
21	232306	4.01	3	1.766784	1.5625	vam	0.087413	0.27027	0.117647	0.27027	291	303	21	27	16.52110919	20.93743636	2.093564812	1.480846345	5.66	6.4	11.44	3.7	8.5	3.7
22	232307	4.46	4	1.808318	2.439024	vam	0.291545	0.4	0.262467	0.27027	317	402	22	29	46.14965934	64.5906	0.239386716	1.52	5.53	4.1	3.43	2.5	3.81	3.7
23	233102	4.52	3	1.449275	2.12766	vam	0.169492	0.243902	0.163934	0.208333	NA	238	12	22	4.909639682	12.3662241	1.568948791	2.655822643	6.9	4.7	5.9	4.1	6.1	4.8
24	233103	4.88	4	1.538462	1.923077	vam	0.228311	0.341297	0.212766	0.278552	287	402	18	27	46.67007775	72.1896902	-0.124594794	0.465019676	6.5	5.2	4.38	2.93	4.7	3.59
25	233104	4.64	4	1.09529	1.730104	vam	0.178891	0.253807	0.162602	0.197239	NA	NA	15	17	7.325841983	8.509205147	1.675937475	2.181999248	9.13	5.78	5.59	3.94	6.15	5.07
26	233105	4.1	4	1.769912	2.257336	vam	0.146843	0.338983	0.232019	0.2331	243	NA	14	23	6.698179845	10.49785057	0.421901773	1.24150369	5.65	4.43	6.81	2.95	4.31	4.29
27	233401	6.99	1	1.569859	1.322751	vam	0.262467	0.111359	0.131752	0	387	257	24	15	25.69211655	44.93212476	1.560939573	2.166109525	6.37	7.56	3.81	8.98	7.59	NA
28	233402	6.97	1	1.470588	0.980392	vam	0.181818	0.068027	0.136986	0	283	201	13	6	46.24886945	49.34374656	0.872728006	1.37038887	6.8	10.2	5.5	14.7	7.3	NA
29	233403	6.38	1	1.785714	1.492537	vam	0.232558	0.217391	0.2	0.080645	306	295	16	15	29.42294729	35.47947527	1.598825183	1.961984738	5.6	6.7	4.3	4.6	5	12.4
30	233404	6.09	1	1.052632	0.442478	vam	0.123457	0.048309	0.098039	0	248	NA	10	4	5.439178303	3.446317455	0.834922608	1.340374937	9.5	22.6	8.1	20.7	10.2	NA
31	233405	6.91	1	2.207506	1.976285	vam	0.201207	0.226757	0.273973	0.17301	350	402	26	25	20.05181056	19.59981144	-0.376513112	0.04105354	4.53	5.06	4.97	4.41	3.65	5.78
32	233406	4.83	1	1.577287	1.754386	vam	0.15456	0.263158	0.15528	0.175439	346	332	21	19	85.97427946	84.24415568	1.941662866	2.3726809	6.34	5.7	6.47	3.8	6.44	5.7
33	233408	4.23	1	1.754386	2.380952	vam	0.277778	0.37037	0.294118	0.25	NA	330	21	25	78.18430591	61.17334974	1.866963218	1.922564052	5.7	4.2	3.6	2.7	3.4	4
34	233409	6.15	3	1.923077	1.923077	vam	0.322581	0.263158	0.263158	0.227273	332	442	21	21	13.18373382	10.04899657	0.791718795	0.976196551	5.2	5.2	3.1	3.8	3.8	4.4
35	233501	4.97	3	1.587302	2.173913	vam	0.196078	0.277778	0.108696	0.227273	264	375	17	22	5.071539024	5.467072524	1.523980434	1.800575698	6.3	4.6	5.1	3.6	9.2	4.4
36	233502	5.52	3	2.083333	2.083333	vam	0.384615	0.294118	0.25641	0.172414	375	407	28	25	54.67972878	72.88348553	0.980464877	2.149125592	4.8	4.8	2.6	3.4	3.9	5.8
37	233503	6.72	3	2.040816	2.222222	vam	0.333333	0.344828	0.212766	0.25641	440	476	25	30	5.103795308	6.02123132	1.289639869	1.276511935	4.9	4.5	3	2.9	4.7	3.9
38	233504	5.71	3	2.380952	NA	vam	0.357143	NA	0.285714	NA	431	NA	27	NA	48.30653793	NA	0.599620889	NA	4.2	NA	2.8	NA	3.5	NA
39	233505	6.59	4	1.785714	2.5	vam	0.263158	0.416667	0.2	0.25	359	390	23	26	1.494009173	3.760285801	0.730010426	0.488384836	5.6	4	3.8	2.4	5	4
40	233506	5.06	4	1.694915	2.173913	vam	0.185185	0.27027	0.208333	0.25641	291	461	18	29	22.2002947	17.59034483	1.355405199	1.437012192	5.9	4.6	5.4	3.7	4.8	3.9
41	234601	6.76	1	1.639344	1.449275	vam	0.277778	0.232558	0.222222	0.204082	406	375	25	26	4.73662205	2.746883081	1.289639869	1.938585321	6.1	6.9	3.6	4.3	4.5	4.9
42	234801	5.14	2	2.040816	2.380952	vam	0.454545	0.714286	0.3125	0.47619	315	418	25	28	19.08338594	25.79120109	1.123424637	1.40043423	4.9	4.2	2.2	1.4	3.2	2.1
43	234802	6.11	2	2.5	2.631579	vam	0.526316	0.588235	0.333333	0.384615	402	436	31	33	23.38963723	14.54123605	0.900501248	0.56042374	4	3.8	1.9	1.7	3	2.6
44	234803	5.06	2	2.12766	2.475248	vam	0.454545	0.694444	0.277778	0.319489	359	450	26	28	16.39566336	25.85487217	0.881995755	1.228310695	4.7	4.04	2.2	1.44	3.6	3.13
45	234804	6.49	3	2.040816	1.984127	vam	0.465116	0.571429	0.25641	0.225734	396	358	18	21	18.11955839	16.41939951	0.885067466	0.388051944	4.9	5.04	2.15	1.75	3.9	4.43
46	234806	4.59	3	2.222222	2.688172	vam	0.666667	0.694444	0.4	0.47619	350	471	20	29	20.2800241	19.88147923	0.347169224	1.053693279	4.5	3.72	1.5	1.44	2.5	2.1
47	4	4.94		1.858736059	2.036659878	dnhsnaive	0.145985401	0.213219616	0.182815356	0.142247511					36.22693269	30.52522866	0.533449825	-0.988763961	5.38	4.91	6.85	4.69	5.47	7.03
48	5	4.45		0.899280576	0.875656743	dnhsnaive	0.140449438	0.103626943	0.131578947	NA					3.659975035	23.47937176	0.99838275	0.377259972	11.12	11.42	7.12	9.65	7.6	NA
49	6	4.93		0.868809731	1.404494382	dnhsnaive	0.431034483	0.280898876	0.208333333	0.155520995					18.66402623	39.88476304	0.458811867	0.402040259	11.51	7.12	2.32	3.56	4.8	6.43
50	8	4.38		1.426533524	1.302083333	dnhsnaive	0.120772947	0.171232877	0.192678227	0.166666667					52.10876519	59.20409449	0.701121705	1.266091553	7.01	7.68	8.28	5.84	5.19	6
51	10	4.35		2.136752137	1.712328767	dnhsnaive	0.277777778	0.264550265	0.235294118	0.196463654					35.14561683	36.78121485	1.451585548	0.832003041	4.68	5.84	3.6	3.78	4.25	5.09
52	16	4.81		1.063829787	1.275510204	dnhsnaive	0.071942446	0.132450331	0.143472023	0.106837607					11.30432554	13.14839856	0.367304716	-0.157836393	9.4	7.84	13.9	7.55	6.97	9.36
53	17	4.69		1.841620626	1.897533207	dnhsnaive	0.284090909	0.308641975	0.272479564	0.302114804					45.71723718	9.78764816	0.589146122	1.507617571	5.43	5.27	3.52	3.24	3.67	3.31
54	18	5.33		1.785714286	1.792114695	dnhsnaive	0.275482094	0.21691974	0.2	0.213675214					9.76012509	10.4908754	-0.16640009	-0.617100392	5.6	5.58	3.63	4.61	5	4.68
55	163	5.57		2	1.615508885	dnhsnaive	0.350877193	0.23364486	0.302114804	0.205338809					7.546869491	9.280826256	0.73809345	-0.561947498	5	6.19	2.85	4.28	3.31	4.87
56	205	5.84		1.650165017	1.883239171	dnhsnaive	0.22675737	0.317460317	0.194174757	0.238663484					28.8618378	31.85774463	1.434609257	0.662265329	6.06	5.31	4.41	3.15	5.15	4.19
57	253	5.45		1.818181818	2.012072435	dnhsnaive	0.285714286	0.333333333	0.219298246	0.289017341					26.83674386	18.52348554	1.73082736	2.036470443	5.5	4.97	3.5	3	4.56	3.46
58	261	5.03		1.666666667	2	dnhsnaive	0.285714286	0.344827586	0.303030303	0.277777778					85.16685705	84.39328986	0.817030529	0.270870447	6	5	3.5	2.9	3.3	3.6
59	390	5.9		1.122334456	1	dnhsnaive	0.092506938	0.04	0.102459016	0					42.95308832	44.30130321	-0.689805175	-0.339603584	8.91	10	10.81	25	9.76	NA
60	411	5.26		1.937984496	1.709401709	dnhsnaive	0.283286119	0.260416667	0.204081633	0.160513644					36.80005824	35.7917382	0.748133564	0.36940162	5.16	5.85	3.53	3.84	4.9	6.23
61	417	4.86		1.236093943	1.757469244	dnhsnaive	0.124843945	0.141442716	0.133868809	0.15037594					2.612898647	2.926451355	1.139755751	0.475228958	8.09	5.69	8.01	7.07	7.47	6.65
62	420	5.77		2.096436059	2.207505519	dnhsnaive	0.177935943	0.246305419	0.184842884	0.194931774					23.76749734	25.62937482	0.898411214	-0.189033458	4.77	4.53	5.62	4.06	5.41	5.13
63	427	4.02		1.117318436	1.57480315	dnhsnaive	0.115473441	0.223713647	0.244498778	0.204918033					15.36755843	10.49797199	0.945911119	0.800888187	8.95	6.35	8.66	4.47	4.09	4.88
64	429	4.62		1.524390244	NA	dnhsnaive	0.165837479	NA	0.167504188	NA					3.728888499	NA	0.504525112	NA	6.56	NA	6.03	NA	5.97	NA
65	435	5.44		2.717391304	2.857142857	dnhsnaive	0.288184438	0.523560209	0.220750552	0.485436893					3.257790142	2.4140602	0.013967013	0.357482874	3.68	3.5	3.47	1.91	4.53	2.06
